# Supplementary material
Source: Copernicus journal article supplement (doi:10.5194/essd-18-2979-2026)
Supplement: Supplementary file 1 [file essd-18-2979-2026-supplement.pdf]

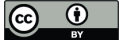

*Supplement of*

## **Creation and analysis of a multi-hazard dataset: Tenerife (Canary Islands) as a case study**

**Marta López-Saavedra et al.**

*Correspondence to:* Marta López-Saavedra ([geomartalopez@gmail.com](mailto:geomartalopez@gmail.com))

The copyright of individual parts of the supplement might differ from the article licence.

**References of the dataset (<https://doi.org/10.20350/digitalCSIC/17088>)**

- A.H.: Atrapado por un desprendimiento. Tenerife: Caso Abierto. La Provincia, (2 June, 2015).
- Acosta, C.: Apuntes generales sobre la Historia de Garachico. Icod de los Vinos: Dirección General de Patrimonio Cultural del Gobierno de Canarias y Excmo. Ayuntamiento de la Villa y Puerto de Garachico, 2019.
- Agencia Estatal de Meteorología (AEMET): Efemérides. Retrieved from [http://www.aemet.es/es/serviciosclimaticos/datosclimatologicos/efemerides\\_sucesos](http://www.aemet.es/es/serviciosclimaticos/datosclimatologicos/efemerides_sucesos), 2021.
- Agencias: El temporal arrasa Gerona y Tenerife: inundaciones y viviendas evacuadas. Santa Cruz de Tenerife: La Nueva España, 19 November, 2018.
- Alcaraz, M. F.: Medidas previstas para paliar los efectos del temporal que ha causado graves daños en Canarias durante el mes de enero de 1999 y plazo para su ejecución. Madrid: Boletín Oficial de las Cortes Generales, Congreso de los Diputados, 11 March, 1999.
- Antena: Semanario deportivo-cultural: Temporal en Canarias. Retrieved from Archivo de Prensa Digital (Jable) de la Universidad de Las Palmas de Gran Canaria (ULPGC). (<https://jable.ulpgc.es/buscar?restore=true>). Las Palmas de Gran Canaria: Universidad de Las Palmas de Gran Canaria, 26 November, 1968.
- Arranz, M.: Riesgos catastróficos en las Islas Canarias. Una visión geográfica. Anales de Geografía, 26, 167-194. <https://revistas.ucm.es/index.php/AGUC/article/view/AGUC0606110167A>, 2006.
- Arroyo, J.: Cinco siglos de la temperie canaria: cronología de efemérides meteorológicas. Tenerife: Asociación Canaria de Meteorología (ACANMET). <https://www.acanmet.org/portal/media/formacion/Microsoft%20Word%20-%20CRONOLOGIA.pdf>, 2009.
- Asociación Canaria de Meteorología (ACANMET): Fichas informativas sobre tiempo severo: Adeje. Retrieved from <http://www.acanmet.org/portal/pages/nuestros-productos/fichas-informativas.php>, 2009a.
- Asociación Canaria de Meteorología (ACANMET): Fichas informativas sobre tiempo severo: Ajuí. Retrieved from <http://www.acanmet.org/portal/pages/nuestros-productos/fichas-informativas.php>, 2009b.
- Asociación Canaria de Meteorología (ACANMET): Fichas informativas sobre tiempo severo: Garachico. Retrieved from <http://www.acanmet.org/portal/pages/nuestros-productos/fichas-informativas.php>, 2009c.
- Asociación Canaria de Meteorología (ACANMET): Fichas informativas sobre tiempo severo: Arteara. Retrieved from <http://www.acanmet.org/portal/pages/nuestros-productos/fichas-informativas.php>, 2013a.
- Asociación Canaria de Meteorología (ACANMET): Fichas informativas sobre tiempo severo: Órzola. Retrieved from <http://www.acanmet.org/portal/pages/nuestros-productos/fichas-informativas.php>, 2013b.
- Asociación Española de Climatología (Ed.): El clima: aire, agua, tierra y fuego. 11 Congreso de la Asociación Española de Climatología. Murcia: Publicaciones de la Asociación Española de Climatología (AEC), Grupo de Modelización Atmosférica Regional, Universidad de Murcia, 2018.
- Ayuntamiento de la Villa de La Orotava: Plan de Emergencias Municipal de la Villa de La Orotava (PEMU). La Orotava: Concejalía de Ordenación del Territorio, Patrimonio Histórico, Infraestructuras, Seguridad Ciudadana, Tráfico y Protección Civil, 2011.
- Ayuntamiento de Santa Cruz de Tenerife: Plan de Emergencias Municipal. Santa Cruz de Tenerife: Ayuntamiento de Santa Cruz de Tenerife, 2015.
- Barquín, L.: El tratamiento informativo de las riadas en la ciudad de Santa Cruz de Tenerife en la prensa local durante el periodo 2002-2014 (Degree's thesis). Retrieved from Repositorio Institucional de la Universidad de La Laguna (RIULL). (<http://riull.ull.es/xmlui/handle/915/1024>). La Laguna: Universidad de La Laguna, 2015.
- Berthelot, S.: Misceláneas canarias. La Laguna: Francisco Lemus Editor, 1997.

- Bethencourt, J., Dorta, P., & Criado, C.: El temporal de 1826: reconstrucción de sus causas y sus consecuencias en la isla de Tenerife. In J. Sigró, M. Brunet, E. Aguilar (Eds.), *Cambio Climático Regional y sus Impactos*. Tarragona, Spain: Actas del VI Congreso Internacional de Tarragona de la Asociación Española de Climatología (AEC), 2008.
- Cabildo Insular de Tenerife: El Plan Territorial Insular de Emergencias de Protección Civil de la Isla de Tenerife (PEIN). Servicio Técnico de Seguridad y Protección Civil: Tenerife, 2004.
- Carracedo, J. C.: El volcán Teide: volcanología, interpretación de paisajes e itinerarios comentados. Tenerife: Servicio de Publicaciones de la Caja General de Ahorros de Canarias, 2008.
- Carracedo, J. C., Pérez-Torrado, F. J., Rodríguez Badiola, E., Paris, R., & Singer, B. S.: Fiabilidad de la interpretación de las referencias de erupciones subhistóricas de Tenerife: la erupción preholocena de Mña. Taoro. *Geo-Temas*, 10, 1261-1264. <http://hdl.handle.net/10261/5961>, 2008.
- Carracedo, J. C., Rodríguez Badiola, E., Pérez Torrado, F. J., Hansen, A., Rodríguez González, A., Scaillet, S., Guillou, H., Paterno, M., Fra Paleo, U., Paris, R.: La erupción que Cristobal Colón vio en La Isla de Tenerife (Islas Canarias). *Geogaceta*, 41, 39-42. <http://hdl.handle.net/10272/8494>, 2007.
- Chijeb, N.: Santa Lucía recobra algo de luz. Santa Cruz de Tenerife: Diario de Avisos, 23 June, 2011.
- Cioranescu, A.: La Laguna. Guía histórica y monumental. La Laguna: Litografía A. Romero, Ayuntamiento de San Cristóbal de La Laguna, 1965.
- Cioranescu, A.: Garachico. Santa Cruz de Tenerife: Aula de Cultura del Cabildo Insular de Tenerife, 1977.
- Coello, E., Romero, C., Dóniz, J., & Guillén, C.: El volcán de Arafo (erupción de 1705 en Tenerife). *Sureste*, 8, 93-95, 2006.
- Cola, L.: Barranco de Santos. Paper presented at a Conference on 4 July 2013, Centro de Historia y Cultura Militar Almeyda, Santa Cruz de Tenerife, 2013.
- Cólogan, B.: Noticia de algunos terremotos que se han experimentado en estas Islas. Retrieved from Archivo de Zárate Cologan. Tenerife: Archivo Histórico Provincial de Santa Cruz de Tenerife, Manuscript (n.d.).
- Consejería de Agricultura y Pesca: ORDEN de 5 de junio de 1990. Santa Cruz de Tenerife: Boletín Oficial de Canarias (núm. 77), 22 June, 1990.
- Consejería de Empleo y Asuntos Sociales: ORDEN de 8 de mayo de 2002. Santa Cruz de Tenerife: Boletín Oficial de Canarias (núm. 61), 13 May, 2002.
- Consejería de Empleo, Industria y Comercio: ORDEN de 4 de mayo de 2010. Santa Cruz de Tenerife: Boletín Oficial de Canarias (núm. 93), 13 May, 2010.
- Consejería de Empleo, Industria y Comercio: ORDEN de 8 de julio de 2011. Santa Cruz de Tenerife: Boletín Oficial de Canarias (núm. 142), 20 July, 2011.
- Consejería de Industria, Comercio y Nuevas Tecnologías: ORDEN de 20 de abril de 2006. Santa Cruz de Tenerife: Boletín Oficial de Canarias (núm. 83), 2 May, 2006.
- Consejería de Turismo: ORDEN de 12 de abril de 2010. Santa Cruz de Tenerife: Boletín Oficial de Canarias (núm. 80), 26 April, 2010.
- Consejo Insular de Aguas de Tenerife: Plan de Defensa Frente Avenidas de Tenerife (PDA). Tenerife: Cabildo Insular de Tenerife, 2004.
- Consejo Insular de Aguas de Tenerife: Revisión de la Evaluación Preliminar del Riesgo de Inundación (2º Ciclo). Tenerife: Consejo Insular de Aguas de Tenerife, 2019.
- COPE: El terremoto que Tenerife no olvidará nunca. Retrieved from [https://www.cope.es/emisoras/canarias/santa-cruz-de-tenerife/tenerife/noticias/terremoto-que-tenerife-olvidara-nunca-20210127\\_1108965](https://www.cope.es/emisoras/canarias/santa-cruz-de-tenerife/tenerife/noticias/terremoto-que-tenerife-olvidara-nunca-20210127_1108965). Tenerife: COPE radio, 27 January, 2021.
- CTQ: Un viento muy fuerte y la lluvia siembran Tenerife de problemas. Canarias: CTQ, 21 October, 2020.
- De León, F.: Historia de las Islas Canarias (1766-1868). La Laguna: Instituto de Estudios Canarios, 1966.
- Del Pino, H.: 140 litros de agua y dos horas para cambiar Santa Cruz de Tenerife. Santa Cruz de Tenerife: El Día, 19 October, 2020.

- 105 Destino: Un ciclón sobre el valle de La Orotava. Retrieved from Archivo de Revistas Catalanas Antiguas (ARCA). ([https://arca.bnc.cat/arcabib\\_pro/ca/inicio/inicio.do](https://arca.bnc.cat/arcabib_pro/ca/inicio/inicio.do)). Barcelona: Biblioteca de Cataluña, 31 January, 1953.
- Diario de Avisos: El IGN registra un terremoto de 4,4 entre Tenerife y Gran Canaria. Retrieved from Hemeroteca Diario de Avisos. (<http://hemeroteca.diariodeavisos.com/>). Santa Cruz de Tenerife: Diario de Avisos, 18 January, 2019.
- 110 Diario de Avisos: Una gran tromba de agua inundó la isla de Tenerife. Retrieved from Hemeroteca Diario de Avisos. (<http://hemeroteca.diariodeavisos.com/>). Santa Cruz de Tenerife: Diario de Avisos, 29 October, 1993.
- Diario de Avisos: El movimiento sísmico de ayer, sin importancia. Retrieved from Hemeroteca Diario de Avisos. (<http://hemeroteca.diariodeavisos.com/>). Santa Cruz de Tenerife: Diario de Avisos, 3  
115 November, 1977.
- Diario de Avisos: El temporal amaina tras ocasionar cuantiosos daños. Retrieved from Hemeroteca Diario de Avisos. (<http://hemeroteca.diariodeavisos.com/>). Santa Cruz de Tenerife: Diario de Avisos, 9 January, 1999.
- Diario de Burgos: de avisos y noticias: Sucesos. Retrieved from Biblioteca Virtual de Prensa  
120 Histórica (BVPH). (<https://prensahistorica.mcu.es/es/inicio/inicio.do>). La Laguna: Ministerio de Cultura y Deporte, 10 January, 1990.
- Diario de Navarra: Registrado un terremoto de 3,4 grados en Tenerife sin causar daños. Santa Cruz de Tenerife: Diario de Navarra, 13 May, 2008.
- Diario de Tenerife: Noticias de prensa. Retrieved from Biblioteca Virtual de Prensa Histórica  
125 (BVPH). (<https://prensahistorica.mcu.es/es/inicio/inicio.do>). La Laguna: Ministerio de Cultura y Deporte, 22 April 1901.
- Diario de Tenerife: Noticias de prensa. Retrieved from Biblioteca Virtual de Prensa Histórica (BVPH). (<https://prensahistorica.mcu.es/es/inicio/inicio.do>). La Laguna: Ministerio de Cultura y Deporte, 8 November 1904.
- 130 Díaz-Ordóñez, M.: La pérdida de Reina Regente en la prensa de Santa Cruz de Tenerife. *Revista general de marina*, 256(1-2), 95-102. <https://hdl.handle.net/11441/84065>, 2009.
- Dirección General de Protección Civil: Catálogo Nacional de Inundaciones Históricas. Retrieved from <http://cnih.proteccioncivil.es/cnih/index.php?r=site/inicio>, 2014.
- Dorta, P.: Catálogo de riesgos climáticos en Canarias: Amenazas y vulnerabilidad.  
135 *Geographicalia*, 51(51), 133-160. [https://doi.org/10.26754/ojs\\_geoph/geoph.2007511118](https://doi.org/10.26754/ojs_geoph/geoph.2007511118)
- Duran, J. J., Martínez, J., & Peña, J. L.: Mapas previsores de riesgo de inundación en los núcleos urbanos de Güímar y Playa de las Américas (Tenerife); Serie Ingeniería GeoAmbiental. Santa Cruz de Tenerife: Instituto Tecnológico y Geominero de España, 1989.
- EFE: Dos muertos por un desprendimiento de rocas sobre una playa de Tenerife. Santa Cruz de  
140 Tenerife: Información, 2 November, 2009.
- EFE: Las lluvias ocasionan desprendimientos y cortes de carreteras en Tenerife. Santa Cruz de Tenerife: El Día, 7 November, 2012a.
- EFE: Se da por finalizada la alerta en Tenerife por lluvias. Santa Cruz de Tenerife: El Día, 7  
November, 2012b.
- 145 El Día: El Gobierno canario declara la situación de alerta por lluvias en Tenerife. Santa Cruz de Tenerife: El Día, 7 November, 2012a.
- El Día: La tormenta abandona el Archipiélago y se desplaza hacia el oeste peninsular. Santa Cruz de Tenerife: El Día, 7 November, 2012b.
- El Eco de Canarias: Noticias de prensa. Retrieved from Archivo de Prensa Digital (Jable) de la  
150 Universidad de Las Palmas de Gran Canaria (ULPGC). (<https://jable.ulpgc.es/buscar?restore=true>). Las Palmas de Gran Canaria: Universidad de Las Palmas de Gran Canaria, 12 April, 1977.
- El Eco de Canarias: Temporal de agua y nieve. Retrieved from Archivo de Prensa Digital (Jable) de la Universidad de Las Palmas de Gran Canaria (ULPGC). (<https://jable.ulpgc.es/buscar?restore=true>). Las Palmas de Gran Canaria: Universidad de Las Palmas de Gran Canaria, 14 February, 1971.
- 155 El Eco de Canarias: Tres fuertes temblores de tierra en Tenerife. Retrieved from Archivo de Prensa Digital (Jable) de la Universidad de Las Palmas de Gran Canaria (ULPGC).

(<https://jable.ulpgc.es/buscar?restore=true>). Las Palmas de Gran Canaria: Universidad de Las Palmas de Gran Canaria, 22 May, 1964.

160 El Eco de Canarias: Noticias de prensa. Retrieved from Archivo de Prensa Digital (Jable) de la Universidad de Las Palmas de Gran Canaria (ULPGC). (<https://jable.ulpgc.es/buscar?restore=true>). Las Palmas de Gran Canaria: Universidad de Las Palmas de Gran Canaria, 6 January, 1971.

El Eco de Canarias: El terremoto con epicentro en el Sur de Canarias se sintió en Gran Canaria (San Mateo y Puerto de Las Nieves) y Tenerife (La Orotava). Canarias: El Eco de Canarias, 6 November, 2015.

165 El Eco del Comercio: Noticias de prensa. Retrieved from Archivo de Prensa Digital (Jable) de la Universidad de Las Palmas de Gran Canaria (ULPGC). (<https://jable.ulpgc.es/buscar?restore=true>). Las Palmas de Gran Canaria: Universidad de Las Palmas de Gran Canaria, 11 November, 1865.

El Mundo: Inundaciones en Tenerife y bajada de temperatura por una masa de aire polar en la Península. Madrid: El Mundo, 5 November, 2016.

170 El País: Un terremoto de magnitud cuatro afecta a Tenerife y Gran Canaria. Santa Cruz de Tenerife: El País, 5 February, 2010.

El País: Un terremoto de magnitud 4,1 sacude Tenerife y Gran Canaria. Santa Cruz de Tenerife: El País, 5 October, 1992.

175 El Progreso: Noticias de prensa. Retrieved from Biblioteca Virtual de Prensa Histórica. (<https://prensahistorica.mcu.es/es/inicio/inicio.do>). España: Ministerio de Cultura y Deporte, 16 and 18 January, 1926.

El Progreso: Noticias de prensa. Retrieved from Biblioteca Virtual de Prensa Histórica. (<https://prensahistorica.mcu.es/es/inicio/inicio.do>). España: Ministerio de Cultura y Deporte, 16 May, 1927.

180 El Progreso: Noticias de prensa. Retrieved from Biblioteca Virtual de Prensa Histórica. (<https://prensahistorica.mcu.es/es/inicio/inicio.do>). España: Ministerio de Cultura y Deporte, 19 November, 1908.

El Progreso: Noticias de prensa. Retrieved from Biblioteca Virtual de Prensa Histórica. (<https://prensahistorica.mcu.es/es/inicio/inicio.do>). España: Ministerio de Cultura y Deporte, 23

185 December, 1911.

El Progreso: La tormenta de ayer. Retrieved from Biblioteca Virtual de Prensa Histórica. (<https://prensahistorica.mcu.es/es/inicio/inicio.do>). España: Ministerio de Cultura y Deporte, 23 November 1914.

190 El Progreso: El mal tiempo. Retrieved from Biblioteca Virtual de Prensa Histórica. (<https://prensahistorica.mcu.es/es/inicio/inicio.do>). España: Ministerio de Cultura y Deporte, 3, 4 and 6 March, 1920.

El Progreso: Noticias de prensa. Retrieved from Biblioteca Virtual de Prensa Histórica. (<https://prensahistorica.mcu.es/es/inicio/inicio.do>). España: Ministerio de Cultura y Deporte, 30 November, 1, 2, 4 and 6 December, 1922.

195 El Progreso: Noticias de prensa. Retrieved from Biblioteca Virtual de Prensa Histórica. (<https://prensahistorica.mcu.es/es/inicio/inicio.do>). España: Ministerio de Cultura y Deporte, 5 January, 1909.

El Progreso: El peligro que ofrece el contacto con hilos eléctricos. Retrieved from Biblioteca Virtual de Prensa Histórica. (<https://prensahistorica.mcu.es/es/inicio/inicio.do>). España: Ministerio de Cultura y Deporte, 8 February 1912.

200 El Tiempo: Noticias de prensa. Retrieved from Archivo de Prensa Digital (Jable) de la Universidad de Las Palmas de Gran Canaria (ULPGC). (<https://jable.ulpgc.es/buscar?restore=true>). Las Palmas de Gran Canaria: Universidad de Las Palmas de Gran Canaria, 4 November 1904.

Elchaplon: El norte tinerfeño registró un movimiento sísmico de 3,9° Richter. Lanzarote: Diario Digital de Lanzarote, 30 October, 2016.

205 Europa Press: La playa de La Arena (Tenerife) seguirá cerrada parcialmente tras el desprendimiento. Tenerife: 20minutos, 25 August, 2018.

Europa Press: El Cabildo de Tenerife valora el alcance de los daños del temporal en Guía de Isora. Santa Cruz de Tenerife: El Día, 5 March, 2013.

- 210 Europa Press: El Cabildo de Tenerife reabre al tráfico la carretera TF-235 tras la limpieza de la vía. Santa Cruz de Tenerife: Canarias, 7 November, 2012a.  
Europa Press: La lluvia provoca diversas incidencias en barrancos y carreteras de Tenerife. Santa Cruz de Tenerife: La Vanguardia, 7 November, 2012b.  
Europa Press: Los bomberos intervienen en una treintena de servicios por las lluvias registradas en Tenerife. Santa Cruz de Tenerife: El Día, 7 November, 2012c.
- 215 Falange: Diario de la tarde: Resumen informativo. Retrieved from Archivo de Prensa Digital (Jable) de la Universidad de Las Palmas de Gran Canaria (ULPGC). (<https://jable.ulpgc.es/buscar?restore=true>). Las Palmas de Gran Canaria: Universidad de Las Palmas de Gran Canaria, 24 January, 1947.
- 220 Falange: Diario de la tarde: Resumen informativo. Retrieved from Archivo de Prensa Digital (Jable) de la Universidad de Las Palmas de Gran Canaria (ULPGC). (<https://jable.ulpgc.es/buscar?restore=true>). Las Palmas de Gran Canaria: Universidad de Las Palmas de Gran Canaria, 25 February, 1950.
- 225 Falange: Diario de la tarde: Resumen informativo. Retrieved from Archivo de Prensa Digital (Jable) de la Universidad de Las Palmas de Gran Canaria (ULPGC). (<https://jable.ulpgc.es/buscar?restore=true>). Las Palmas de Gran Canaria: Universidad de Las Palmas de Gran Canaria, 8 May, 1947.
- Feo, J.: Los destrozos del temporal en la playa superan los 100.000 euros. Guía de Isora: El Día, 7 March, 2013.
- 230 Fernández, C.: Dos muertos por el temporal de lluvias en Canarias. Santa Cruz de Tenerife: El País, 12 March, 1996.
- Fumero, P., Martín, V., Sánchez, R.: Nieve, derrumbes, accidentes e inundaciones. Santa Cruz de Tenerife: El Día, 19 February, 2016.
- 235 Gaceta de Tenerife: Temblor de tierra. Retrieved from Biblioteca Virtual de Prensa Histórica. (<https://prensahistorica.mcu.es/es/inicio/inicio.do>). España: Ministerio de Cultura y Deporte, 14 May, 1918.
- Gaceta de Tenerife: Noticias de prensa. Retrieved from Biblioteca Virtual de Prensa Histórica. (<https://prensahistorica.mcu.es/es/inicio/inicio.do>). España: Ministerio de Cultura y Deporte, 16 and 17 January, 1926.
- 240 Gaceta de Tenerife: Ayer se produjeron dos emblores de tierra en Garachico. Retrieved from Biblioteca Virtual de Prensa Histórica. España: Ministerio de Cultura y Deporte. <https://prensahistorica.mcu.es/es/inicio/inicio.do>, 22 June, 1937.
- 245 Gaceta de Tenerife: Noticias de prensa. Retrieved from Biblioteca Virtual de Prensa Histórica. España: Ministerio de Cultura y Deporte. <https://prensahistorica.mcu.es/es/inicio/inicio.do>, 30 November, 1, 2 and 3 December, 1922
- Gaceta de Tenerife: Noticias de prensa. Retrieved from Biblioteca Virtual de Prensa Histórica. España: Ministerio de Cultura y Deporte. <https://prensahistorica.mcu.es/es/inicio/inicio.do>, 4 to 5 March, 1920.
- 250 Gaceta de Tenerife: Los temporales. Retrieved from Biblioteca Virtual de Prensa Histórica. España: Ministerio de Cultura y Deporte. <https://prensahistorica.mcu.es/es/inicio/inicio.do>, 4 to 8 January, 1918.
- Gaceta de Tenerife: El huracán del lunes. Retrieved from Biblioteca Virtual de Prensa Histórica. España: Ministerio de Cultura y Deporte. <https://prensahistorica.mcu.es/es/inicio/inicio.do>, 7 February, 1912.
- 255 Gaceta de Tenerife: El huracán del lunes. Retrieved from Biblioteca Virtual de Prensa Histórica. España: Ministerio de Cultura y Deporte. <https://prensahistorica.mcu.es/es/inicio/inicio.do>, 9 February, 1912.
- 260 Galbis, J.: Catálogo Sísmico de la zona comprendida entre los meridianos 5°E y 20°W y paralelos 45°N y 25°N (Tomo I). Madrid: Dirección General del Instituto Geográfico, Catastral y de Estadística, 1940.

- Galindo, I., Romero, C., Martín-González, E., Vegas, J., Sánchez, N.: A Review on Historical Tsunamis in the Canary Islands: Implications for Tsunami Risk Reduction. *Geosciences*, 11(5), 222. <https://doi.org/10.3390/geosciences11050222>, 2021.
- 265      García, C.: Corte de semáforos y desbordamiento de alcantarillados en Santa Cruz de Tenerife. Las Palmas de Gran Canaria: La Provincia, 9 January, 2014.
- Ginovés, P., & Castellano, A.: Una fuerte tormenta deja inundaciones en Tenerife y 811 rayos en seis horas. Las Palmas de Gran Canaria: La Provincia, 6 November, 2016.
- Gobierno de Canarias e Instituto Geográfico Nacional: Canarias - Terremotos. Retrieved from <https://www.dsn.gob.es/es/actualidad/seguridad-nacional-ultima-hora/canarias-terremotos>, 2017.
- 270      Grupo Parlamentario Coalición Canaria: Proposición no de Ley. Madrid: Diario de Sesiones del Congreso de los Diputados, 23 February, 1999.
- Grupo Socialista Canario: Proposición no de Ley. Canarias: Boletín Oficial del Parlamento de Canarias, 2 May, 2002.
- 275      Hernández, J.: Efectos del aluvión de 1826 en Güímar. *Revista de Historia Canaria*, 41, 157-164, 1968.
- Información: Dos muertos por un desprendimiento de rocas sobre una playa de Tenerife. Retrieved from: <https://www.informacion.es/nacional/2009/11/02/muertos-desprendimiento-rocas-playa-tenerife-7260003.html>, 2009.
- 280      Instituto Geográfico Nacional (IGN): Revisión del Catálogo Sísmico de las Islas Canarias (1341-2000). Retrieved from [https://www.ign.es/web/resources/acercaDe/libDigPub/Catalogo\\_Sismolog%C3%ADa\\_Canarias.pdf](https://www.ign.es/web/resources/acercaDe/libDigPub/Catalogo_Sismolog%C3%ADa_Canarias.pdf), 2020.
- Instituto Geográfico Nacional (IGN): Catálogo de terremotos. <https://doi.org/10.7419/162.03.2022>, 2021.
- 285      Instituto Geológico y Minero de España (IGME): Análisis del impacto de los riesgos geológicos en España. Evaluación de pérdidas por terremotos e inundaciones en el periodo 1987 - 2001 y estimación para el periodo 2004 - 2033. Retrieved from [http://info.igme.es/SidPDF/112000/337/Tomo%201.%20Memoria/112337\\_0001.pdf](http://info.igme.es/SidPDF/112000/337/Tomo%201.%20Memoria/112337_0001.pdf), 2006.
- 290      Instituto Geológico y Minero de España (IGME): BDMOVES. Base de Datos de Movimientos del terreno. Retrieved from <https://igme.maps.arcgis.com/home/webmap/viewer.html?webmap=bdba2e8c7189486ba56a657026645d4cc>, 2020.
- Jardiner@s: Intensas lluvias, nieve en el Teide y fuertes vientos por la borrasca. Tenerife: Jardiner@s, 9 January, 2021.
- 295      Jefatura del Estado: Real Decreto-Ley 4/1999, de 9 de abril. Madrid: Boletín Oficial del Estado (núm. 86), 10 April, 1999.
- Jefatura del Estado: Ley 3/2010, de 10 de marzo. Madrid: Boletín Oficial del Estado (núm. 61), 11 March, 2010.
- 300      Jefatura del Estado: Real Decreto-ley 10/2021, de 18 de mayo. Madrid: Boletín Oficial del Estado (núm. 119), 19 May, 2021.
- Jefatura del Estado: Real Decreto-Ley 610/2006, de 20 de mayo. Madrid: Boletín Oficial del Estado (núm. 120), 20 May, 2006.
- Jefatura del Estado: Real Decreto-Ley 1/2002, de 22 de marzo. Madrid: Boletín Oficial del Estado (núm. 71), 23 March, 2002.
- 305      Jefatura del Estado: Real Decreto-Ley 12/2015, de 30 de octubre. Madrid: Boletín Oficial del Estado (núm. 261), 31 October, 2015.
- Jefatura del Estado: Real Decreto-Ley 2/2002, de 5 de abril. Madrid: Boletín Oficial del Estado (núm. 83), 6 April, 2002.
- 310      Jefatura del Estado: Real Decreto-Ley 14/2005, de 2 de diciembre. Madrid: Boletín Oficial del Estado (núm. 291), 6 December, 2005.
- La Falange: Noticias de prensa. Retrieved from Archivo de Prensa Digital (Jable) de la Universidad de Las Palmas de Gran Canaria (ULPGC). (<https://jable.ulpgc.es/buscar?restore=true>). Las Palmas de Gran Canaria: Universidad de Las Palmas de Gran Canaria, 10 and 16 November, 1950.

- 315 La Falange: Noticias de prensa. Retrieved from Archivo de Prensa Digital (Jable) de la  
Universidad de Las Palmas de Gran Canaria (ULPGC). (<https://jable.ulpgc.es/buscar?restore=true>). Las  
Palmas de Gran Canaria: Universidad de Las Palmas de Gran Canaria, 6 and 7 May, 1944.
- La Información: El viento mantiene cerrados tres puertos en Gran Canaria, Tenerife y La Palma.  
Madrid: La Información, 4 March, 2013.
- 320 López, A., Dorta, P., Díaz, J., & Caraballo, O.: Consecuencias de los eventos meteorológicos de  
rango extraordinario en Canarias: Temporales de viento, inundaciones y fenómenos costeros (1996 -  
2016). In Asociación Española de Climatología y Ministerio para la Transición Ecológica-Agencia Estatal  
de Meteorología, 2018.
- Martí, J., Mitjavila, J., Araña, V.: Stratigraphy, structure and geochronology of the Las Cañadas  
caldera (Tenerife, Canary Islands), Geological Magazine, 131(6), 715-727.  
325 <https://doi.org/10.1017/S0016756800012838>, 1994.
- Martín, C.: El temporal que azota Canarias provoca un muerto e incomunica dos islas. Santa  
Cruz de Tenerife: El País, 5 December, 1991.
- Martínez, F.: Vida literaria. Handwritten work, Vol. 7. Tenerife: Archivo de la Real Sociedad  
Económica de Amigos del País de Tenerife, >1807.
- 330 Marzol, M. V.: Lluvias e inundaciones en la ciudad de Santa Cruz de Tenerife. In J. A. Guijarro  
(ed.), El agua y el clima. España: Publicaciones de la Sociedad Española de Climatología, 2002.
- Marzol, M. V., Máyer, P.: Algunas reflexiones acerca del clima de las islas Canarias. Nimbus,  
29-30, 399-416. <http://hdl.handle.net/10835/2961>, 2012.
- 335 Marzol, M. V., Yanes, V., Romero, A., Brito de Azevedo, C., Prada, E., & Martins., S. A.: Los  
riesgos de las lluvias torrenciales en las islas de la Macaronesia (Azores, Madeira, Canarias y Cabo  
Verde). In J. M. Cuadrat, M. A. Saz, S. M. Vicente, S. Lanjeri, M. de Luis Arrillaga, J. C. González-  
Hidalgo (Eds.), Clima, Sociedad y Medio Ambiente (pp. 1-10). Zaragoza: Asociación Española de  
Climatología, 2006.
- Medina, J.A.: Los vecinos siguen en Santa Lucía. Tenerife: El Día, 10 December, 2019.
- 340 Medina, J.A.: Los vecinos de Santa Lucía deben desalojar sus casas la próxima semana.  
Tenerife: El Día, 17 January, 2020.
- Ministerio de la Presidencia: Real Decreto 344/2010, de 19 de marzo. Madrid: Boletín Oficial  
del Estado (núm. 71), 23 March, 2010.
- 345 Ministerio de Medio Ambiente, y Medio Rural y Marino: Episodios de inundaciones:  
diagnóstico de la situación a 17 de marzo de 2010. España: Gobierno de España, 2010.
- Ministerio de Política Territorial: Orden TER/1005/2010, de 22 de abril. Madrid: Boletín Oficial  
del Estado (núm. 99), 24 April, 2010.
- Ministerio de Trabajo e Inmigración: Orden TIN/1162/2010, de 4 de mayo. Madrid: Boletín  
Oficial del Estado (núm. 111), 7 May, 2010.
- 350 Ministerio de Trabajo y Asuntos Exteriores: ORDEN TAS/1430/2002, de 4 de junio. Madrid:  
Boletín Oficial del Estado (núm. 142), 14 June, 2002.
- Ministerio de Vivienda: Orden VIV/2078/2010, de 21 de julio. Madrid: Boletín Oficial del  
Estado (núm. 185), 31 July, 2010.
- 355 Ministerio del Interior: Orden de 15 de julio de 1999. Madrid: Boletín Oficial del Estado (núm.  
173), 15 July, 1999.
- Ministerio del Interior: RESOLUCIÓN de 14 de junio de 2002. Madrid: Boletín Oficial del  
Estado (núm. 153), 27 June, 2002.
- Ministerio del Interior: Orden Int/1233/2002, de 22 mayo. Madrid: Boletín Oficial del Estado  
(núm. 130), 31 May, 2002.
- 360 Ministerio para la Transición Ecológica y el Reto Demográfico: Obra de emergencia para reparar  
los daños producidos por el temporal de el día 19 de octubre de 2014. Recarga de arena en la playa de Las  
Teresitas (San Andrés, Santa Cruz de Tenerife). Retrieved from  
[https://www.miteco.gob.es/es/costas/temas/proteccion-costa/actuaciones-proteccion-costa/santa-cruz-  
tenerife/3804523-las-teresitas.aspx](https://www.miteco.gob.es/es/costas/temas/proteccion-costa/actuaciones-proteccion-costa/santa-cruz-tenerife/3804523-las-teresitas.aspx), 2014.
- 365 Ministro del Interior: Convalidación del Real Decreto-Ley 4/1999, de 9 de abril. Madrid: Diario  
de Sesiones del Congreso de los Diputados, 29 April, 1999.

- Parlamento de Canarias: Comparecencia del Gobierno 6.3 y 6.4. Sesión plenaria núm 54. Santa Cruz de Tenerife: Parlamento de Canarias, 20 January, 1999.
- 370 Peraza, J.: II - Lugar de culto y la parroquia "La Candelaria La Vera" 1826 - 2015: Historia del Barrio de la Vera, Puerto de la Cruz. Retrieved from Archivo Municipal de La Orotava. (<http://archivoorotava.es/blog/>). La Orotava: Ayuntamiento de la Villa de La Orotava, 2015.
- Pérez, M. A.: Efemérides meteorológicas en Canarias del siglo XX y XXI. Retrieved from METEORED (<https://www.tiempo.com/>), 2016.
- 375 Pinto, J. M.: Canarias Prehispánica y África Occidental española. Tenerife: Consejo Superior de Investigaciones Científicas, 1954.
- Presidencia del Gobierno: DECRETO 1/1999, de 12 de enero. Santa Cruz de Tenerife: Bolteín Oficial de Canarias (núm. 7), 15 January, 1999.
- Presidencia del Gobierno: DECRETO 231/2010, de 11 de noviembre. Santa Cruz de Tenerife: Bolteín Oficial de Canarias (núm. 228), 19 November, 2010.
- 380 Presidencia del Gobierno: DECRETO 115/2013, de 5 de diciembre. Santa Cruz de Tenerife: Bolteín Oficial de Canarias (núm. 245), 20 December, 2013
- Presidencia del Gobierno: Plan Territorial de Emergencia de Protección Civil de la Comunidad Autónoma de Canarias (PLATECA). Resolución de 25 de julio. Santa Cruz de Tenerife: Boletín Oficial de Canarias (núm. 154), 2005.
- 385 Presidencia del Gobierno: DECRETO 102/2014, de 23 de octubre. Santa Cruz de Tenerife: Bolteín Oficial de Canarias (núm. 209), 28 October, 2014.
- Presidencia del Gobierno: DECRETO 21/2010, de 25 de febrero. Santa Cruz de Tenerife: Boletín Oficial de Canarias (núm. 43), 3 March, 2010.
- Presidencia del Gobierno: Decreto 147/2009, de 24 de noviembre. Santa Cruz de Tenerife: 390 Bolteín Oficial de Canarias (núm. 234), 30 November, 2009.
- Presidencia del Gobierno: DECRETO 352/2015, de 28 de octubre. Santa Cruz de Tenerife: Bolteín Oficial de Canarias (núm. 212), 30 October, 2015.
- Presidencia del Gobierno: DECRETO 167/2009, de 29 de diciembre. Santa Cruz de Tenerife: Boletín Oficial de Canarias (núm. 2), 5 January, 2010.
- 395 Presidencia del Gobierno: Ley 7/2002, de 18 de julio. Madrid: Boletín Oficial del Estado (núm. 187), 6 August, 2002.
- Presidencia del Gobierno: DECRETO 12/2010, de 4 de febrero. Santa Cruz de Tenerife: Boletín Oficial de Canarias (núm. 26), 9 February, 2010.
- 400 Quintana, P.: Las catástrofes naturales y el desarrollo urbano: el aluvión de 1713 y su repercusión en Las Palmas. *Vegueta*, 6, 53-68, 2002.
- Quirantes, F., Fernández-Pello, L., Yanes, A.: Los aluviones históricos en Canarias. Paper presented at XIII Congreso Nacional de Geografía, Universidad de Sevilla, Sevilla, 1993.
- Rajoy, M.: Convalidación del Real Decreto-ley 1/2002, de 22 de marzo. Madrid: Diario de Sesiones Congreso Diputados (núm. 155), 18 April, 2002.
- 405 Rodríguez de la Cruz, F.: Plan Territorial Especial de Prevención de Riesgos: Isla de La Palma (Borrador). Santa Cruz de la Palma: Cabildo de La Palma, 2016.
- Rodríguez, R.: Parque Nacional del Teide: Guía Geológica. León: Everest, 2016.
- Rodríguez, R.: Torrenciales lluvias y fuertes vientos provocan el caos en Canarias. Santa Cruz de Tenerife: *El País*, 9 January, 1999.
- 410 Romero, C., Beltrán, E.: La Erupción de Arenas Negras Garachico, 1706. Tenerife: Viceconsejería de Medio Ambiente del Gobierno de Canarias, 2007.
- Romero, M. C.: Las manifestaciones volcánicas históricas del Archipiélago Canario, (Doctoral dissertation). Retrieved from Repositorio Institucional de la Universidad de La Laguna (RIULL). (<http://riull.ull.es/xmlui/handle/915/10113>). La Laguna: University of La Laguna, 1990.
- 415 Romero-Ruiz, C., Dóniz-Páez, J., Plaza, E., Cayetano, G.: The impact of 1706 Arenas Negras eruption at Garachico. A study from ancient engravings (Tenerife, Canary Islands, Spain). Paper presented at 300th Anniversary Volcano International Conference GARAVOLCAN 2006, Commemorating the 1706 Arenas Negras Eruption, El Foro de la Atlántida, Garachico, Tenerife, 2006.

- 420 RTVE: Un terremoto de magnitud 3.8 en la escala de Richter se deja sentir en la isla de Tenerife.  
Madrid: rtve.es, 18 August, 2012.
- Rumeu de Armas, A.: Piratería y ataques navales. Las Palmas de Gran Canaria: Gobierno de Canarias, Cabildo Insular de Gran Canaria y Cabildo Insular de Tenerife, 1947.
- Santa Cruz de Tenerife – Ayuntamiento: Torre de San Andrés.  
425 <https://www.santacruzdetenerife.es/web/noticias-y-agenda/noticias/detalle-noticia/bic-xxvii-torre-de-san-andres>, 10 July, 2022.
- Smithsonian Institution: Global Volcanism Program. <https://volcano.si.edu/> (accessed 5 November 2021), 2013.
- Smithsonian Institution: Tenerife: Eruptive history. Retrieved from  
<https://volcano.si.edu/volcano.cfm?vn=383030>, 2013.
- 430 Sobrado, R., Martí, J., Mendoza-Rosas, A. T., Gómez, G.: Volcanic hazard assessment for the Canary Islands (Spain) using extreme value theory. *Natural Hazards and Earth System Sciences*, 11(10), 2741-2753. <https://doi.org/10.5194/nhess-11-2741-2011>, 2011.
- Solana, M. C.: La erupción de 1704-1705 en Tenerife, Islas Canarias. Reconstrucción, peligros asociados y su mitigación. *Geogaceta*, 20(3), 540-542. <http://hdl.handle.net/10272/12349>, 1996.
- 435 Tavío, R.: Question 6L/PO/P-0344 on the tropical storm that affected the Canary Islands in August 2005, addressed to the Government. Santa Cruz de Tenerife: Diario de Sesiones del Parlamento de Canarias (núm. 71), 5 October, 2005.
- Tenerife Ahora: Desprendimientos, inundaciones y fallos eléctricos, entre las incidencias que deja la borrasca en Tenerife. Tenerife: El diario, 26 November, 2020.
- 440 Tenerife Ahora: Alcantarillas rebosadas y riadas en Tenerife a causa de la lluvia. Tenerife: El diario, 3 December, 2020.
- Tenerife Ahora: La borrasca Filomena deja desprendimientos y caída del tendido eléctrico en el sur de Tenerife. Tenerife: El diario, 7 January, 2021.
- Torres, D.: Un terremoto de magnitud 4,1 sacude una treintena de localidades de Tenerife.  
445 Madrid: El Confidencial, 16 July, 2020.
- Tous, J.: La Torre de San Andrés. ¿Merece la Pena Rescatarla? San Cristóbal de La Laguna: J. Tous, 2012.
- Velázquez, J.: Temporal de lluvia en Tenerife, año de 1901. *La Prensa (El Día weekly magazine)*, Thursday 7 February, 2013, 25-27, 2013.
- 450 Yanes, A.: Desastres naturales en Canarias. La costa como espacio de riesgo en Tenerife. *Sémata: Ciencias sociales e humanidades*, 29, 67-89, 2017.
- Yáñez, G.: Episodios de lluvias e inundaciones, otoño 2013 - primavera 2014. *Jornada Técnica sobre Riesgo de Inundaciones: "Episodios Hidrometeorológicos. Lecciones Aprendidas"*. Madrid: Dirección General de Protección Civil y Emergencias, 2014.
